# Supplementary material
Source: Springer Nature journal article supplement (https://www.springermedizin.de/resource/supplementary/13044_2010_22_MOESM6_ESM.pdf/9659972)

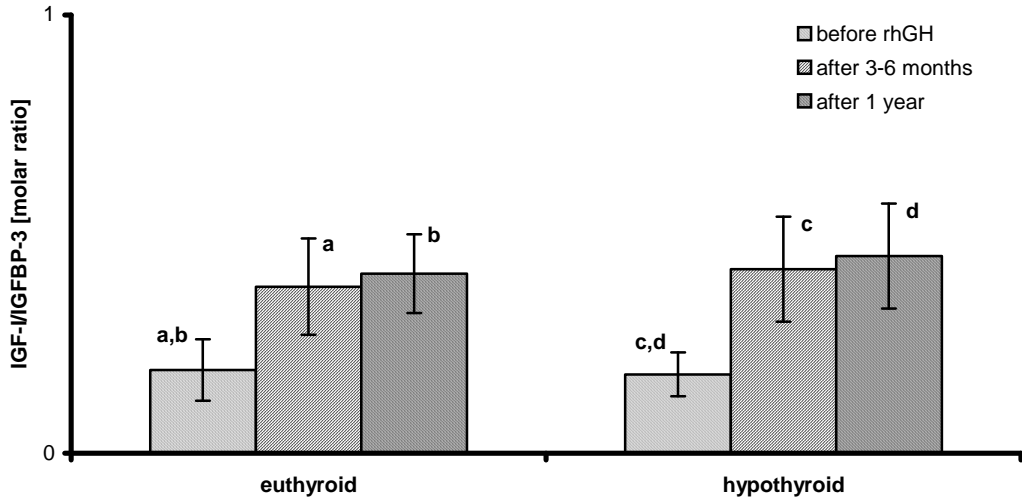

Significant differences: a-d –  $p < 0.01$

Supplement: MOESM6 [file 9659972]
